# Supplementary material
Source: publisher site journal article supplement (https://www.dovepress.com/article/302452)
Supplement: Supplementary file 1 [file get_supplementary_file.php]

**Table S1** Baseline characteristics of included and excluded participants due to missing sleep duration

| Characteristics | Included (n=12,304) | Excluded (n=1,737) |
| --- | --- | --- |
| Age, years | 60.5 (2.5) | 60.5 (2.5) |
| Education |  |  |
| Registered nurse, % | 77.4 | 79.3 |
| Bachelor, % | 16.0 | 15.0 |
| Master or doctorate, % | 6.7 | 5.7 |
| Husband’s education |  |  |
| ≤ High school, % | 51.5 | 51.0 |
| College graduate, % | 27.5 | 29.8 |
| Graduate school, % | 21.0 | 19.1 |
| Race(white), % | 98.4 | 97.1 |
| Marital status, % |  |  |
| Married | 92.8 | 91.4 |
| Widowed | 4.6 | 5.5 |
| Separated‚ divorced‚ or never married | 2.5 | 3.0 |
| Family annual income, 10,000$ | 5.8 (4.6, 7.4) | 5.8 (4.6, 7.5) |
| Family home value, 10,000$ | 12.9 (9.0, 19.7) | 13.2 (9.1, 20.2) |
| BMI, kg/m2 | 25.3 (4.3) | 25.4 (4.3) |
| Smoking status,% |  |  |
| Never smoker | 47.9 | 46.0 |
| Past smoker | 35.8 | 33.2 |
| Current smoker | 16.3 | 20.8 |
| Alcohol intake(g/d),% |  |  |
| None | 41.7 | 36.8 |
| 1-14.9 | 45.7 | 49.1 |
| ≥15 | 12.6 | 14.2 |
| AHEI (no alcohol) | 49.2 (10.8) | 45.4 (10.2) |
| Total energy intake, kcal | 1754.3 (521.0) | 1674.1 (545.1) |
| Total coffee, cup/d | 2.5 (1.0, 2.9) | 2.5 (1.2, 3.5) |
| Physical activity, MET-h/wk | 8.2 (3.0, 20.2) | 8.2 (8.2, 8.2) |
| Standing time, h/d | 4.4 (1.3, 7.2) | 4.4 (1.1, 7.2) |
| Sitting time, h/d | 4.4 (1.1, 4.4) | 2.2 (1.1, 4.4) |
| Family history of diabetes, % | 29.2 | 24.4 |
| Family history of MI, % | 17.0 | 16.5 |
| Family history of cancer, % | 18.1 | 13.8 |
| History of hypertension, % | 20.1 | 15.5 |
| History of high cholesterol, % | 10.0 | 13.8 |
| Use of multivitamin, % | 43.5 | 44.9 |
| Menopausal status and hormone use,% |  |  |
| Pre-menopausal | 1.2 | 1.2 |
| Post and Never used | 73.2 | 80.1 |
| Post and Past user | 3.6 | 0.2 |
| Post and Current user | 21.9 | 18.5 |
| Regular aspirin use (≥ 2 tabs/wk), % | 36.7 | 36.0 |
| Regular snorer, % | 10.3 | 10.2 |
| Night shift work>5 years, 1988, % | 20.8 | 22.8 |
| Sleep position, % |  |  |
| on back | 6.2 | 7.3 |
| on side | 84.2 | 81.8 |
| on front | 9.5 | 10.9 |

Abbreviations: BMI: body mass index (calculated as weight in kilograms divided by the square of height in meters); MET: metabolic-equivalent; AHEI: Alternate-Healthy Eating Index.

Values are means (SD) or medians (*P*25, *P*75) for continuous variables; percentages for categorical variables.

**Table S2.** Odds ratios of healthy aging by sleep duration, stratified by lifestyle factors

| **Sleep duration, hours** | **OR (95%CI)*** | | | | | ***P* for interaction** |
| --- | --- | --- | --- | --- | --- | --- |
| **≤5** | **6** | **7** | **8** | **≥9** |
| **BMI, kg/m2** |  |  |  |  |  | 0.240 |
| <25 (n=6838) | 0.74 (0.50, 1.08) | 0.85 (0.71, 1.02) | 1 (reference) | 0.78 (0.65, 0.93) | 0.65 (0.43, 0.97) |  |
| ≥25 (n=5466) | 1.38 (0.86, 2.21) | 0.95 (0.73, 1.24) | 1 (reference) | 0.98 (0.75, 1.27) | 0.52 (0.27, 0.97) |  |
| **Physical activity, MET-h/wk** |  |  |  |  |  | 0.876 |
| <median(8.2) (n=6120) | 0.83 (0.52, 1.33) | 0.92 (0.74, 1.16) | 1 (reference) | 0.81 (0.64, 1.02) | 0.56 (0.33, 0.95) |  |
| ≥median(8.2) (n=6184) | 1.01 (0.68, 1.49) | 0.85 (0.70, 1.03) | 1 (reference) | 0.84 (0.69, 1.02) | 0.63 (0.41, 0.98) |  |
| **Standing time, h/d** |  |  |  |  |  | **0.044** |
| <4 (n=4959) | 1.03 (0.62, 1.70) | 0.98 (0.76, 1.25) | 1 (reference) | 1.11 (0.87, 1.41) | 0.51 (0.28, 0.93) |  |
| ≥4 (n=6407) | 0.93 (0.63, 1.37) | 0.78 (0.64, 0.96) | 1 (reference) | 0.68 (0.56, 0.84) | 0.59 (0.38, 0.93) |  |
| **Sitting time, h/d** |  |  |  |  |  | **0.007** |
| <4 (n=5413) | 0.64 (0.39, 1.04) | 0.97 (0.78, 1.20) | 1 (reference) | 1.01 (0.81, 1.25) | 0.78 (0.48, 1.25) |  |
| ≥4 (n=5879) | 1.26 (0.83, 1.91) | 0.78 (0.63, 0.97) | 1 (reference) | 0.67 (0.54, 0.84) | 0.50 (0.30, 0.84) |  |
| **Smoking**† |  |  |  |  |  | 0.180 |
| Never smoker (n=5893) | 0.85 (0.56, 1.29) | 0.74 (0.60, 0.91) | 1 (reference) | 0.84 (0.68, 1.02) | 0.61 (0.38, 0.97) |  |
| Smoker (n=6411) † | 1.04 (0.67, 1.60) | 1.04 (0.85, 1.28) | 1 (reference) | 0.82 (0.65, 1.02) | 0.56 (0.34, 0.93) |  |
| **Alcohol intake, g/d** |  |  |  |  |  | 0.604 |
| None (n=4935) | 0.99 (0.62, 1.60) | 0.83 (0.65, 1.06) | 1 (reference) | 0.92 (0.72, 1.17) | 0.67 (0.39, 1.15) |  |
| 1-14.9 (n=5406) | 1.04 (0.68, 1.60) | 0.87 (0.70, 1.08) | 1 (reference) | 0.71 (0.56, 0.89) | 0.51 (0.30, 0.89) |  |
| ≥15 (n=1495) | 0.41 (0.12, 1.40) | 0.98 (0.63, 1.52) | 1 (reference) | 0.92 (0.61, 1.39) | 0.67 (0.31, 1.44) |  |
| **AHEI** |  |  |  |  |  | 0.825 |
| <48.7 (n=5888) | 1.00 (0.64, 1.58) | 0.93 (0.74, 1.17) | 1 (reference) | 0.86 (0.68, 1.08) | 0.52 (0.30, 0.92) |  |
| ≥48.7 (n=5888) | 0.90 (0.60, 1.35) | 0.84 (0.69, 1.03) | 1 (reference) | 0.81 (0.66, 1.00) | 0.72 (0.47, 1.11) |  |
| **Total calorie intake, kcal/day** |  |  |  |  |  | 0.471 |
| <1701 (n=5921) | 1.12 (0.75, 1.67) | 0.90 (0.73, 1.11) | 1 (reference) | 0.87 (0.70, 1.07) | 0.82 (0.52, 1.30) |  |
| ≥1701 (n=5915) | 0.76 (0.47, 1.23) | 0.87 (0.70, 1.08) | 1 (reference) | 0.78 (0.63, 0.97) | 0.49 (0.29, 0.82) |  |

*Model was adjusted for age (continuous), education (registered nurse, bachelor, or graduate), marital status (married, widowed, or separated/divorced), household income (quintiles); family history of cancer, MI and diabetes (yes or no); baseline hypertension and high cholesterol (yes or no); menopausal status and hormone use (premenopausal, postmenopausal never users, postmenopausal past users, postmenopausal current users), aspirin use (regular use or not); BMI (<18.5, 18.5-24.9, 25-29.9, ≥30 kg/m2), smoking history (never, former smoker, current smoker), alcohol intake (none, 1-14.9, ≥15 g/d), total energy intake(quintiles), diet quality(Alternate Healthy Eating Index score, quintiles), physical activity (MET-h/wk), standing and sitting time (all in quintiles).

† The current and past smoker groups were combined due to small sample size in the current smoker group.

**Table S3.** Odds ratios of healthy aging by sleep duration in the Nurses’ Health Study, secondary analysis*

| **Outcome** | **Model** | **OR (95%CI)** | | | | |
| --- | --- | --- | --- | --- | --- | --- |
| **5h** | **6h** | **7h** | **8h** | **9h** |
| Healthy aging | Age-adjusted | 0.85 (0.64, 1.12) | 0.86 (0.75, 0.99) | 1 (ref) | 0.80 (0.70, 0.93) | 0.51 (0.37, 0.71) |
| MV2-adjusted † | 0.92 (0.68, 1.23) | 0.90 (0.78, 1.05) | 1 (ref) | 0.84 (0.73, 0.98) | 0.60 (0.43, 0.85) |
| Free of chronic diseases | MV2-adjusted † | 0.95 (0.80, 1.13) | 1.09 (1.00, 1.19) | 1 (ref) | 0.99 (0.91, 1.08) | 0.89 (0.76, 1.04) |
| Good physical function | MV2-adjusted † | 0.93 (0.75, 1.14) | 0.97 (0.88, 1.08) | 1 (ref) | 0.87 (0.79, 0.96) | 0.69 (0.56, 0.86) |
| Good mental health | MV2-adjusted † | 0.71 (0.59, 0.86) | 0.90 (0.83, 0.99) | 1 (ref) | 0.96 (0.88, 1.05) | 0.83 (0.70, 0.99) |
| Good cognitive function | MV2-adjusted † | 0.74 (0.61, 0.89) | 1.10 (0.99, 1.22) | 1 (ref) | 0.97 (0.87, 1.07) | 0.83 (0.69, 0.99) |

Abbreviations: OR, Odds Ratio; CI, Confidence Interval.

* We included 2,425 women who died before 2000 as usual agers (thus, the total sample size in this analysis is 14,729).

† adjusted for age (continuous), education (registered nurse, bachelor, or graduate), marital status (married, widowed, or separated/divorced), household income (quintiles); family history of cancer, MI and diabetes (yes or no); baseline hypertension and high cholesterol (yes or no); menopausal status and hormone use (premenopausal, postmenopausal never users, postmenopausal past users, postmenopausal current users), aspirin use (regular use or not); smoking history (never, former smoker, current smoker), alcohol intake (none, 1-14.9, ≥15 g/d), total energy intake (quintiles), diet quality (Alternate Healthy Eating Index score, quintiles), physical activity (MET-h/wk), standing and sitting time (all in quintiles); body mass index (BMI <18.5, 18.5-24.9, 25-29.9, ≥30 kg/m2).

**Table S4.** Odds ratios of healthy aging by sleep duration at midlife in the Nurses’ Health Study, sensitivity analysis*

| **Restriction** | **5h** | **6h** | **7h** | **8h** | **9h** |
| --- | --- | --- | --- | --- | --- |
| Additionally adjusted for duration of shift work | | | | | |
| n=10,974 | 0.90 (0.66, 1.24) | 0.87 (0.75, 1.01) | 1 (ref) | 0.79 (0.68, 0.93) | 0.63 (0.45, 0.90) |
| Excluding women with recent night shift work exposure | | | | | |
| n=11,567 | 1.04 (0.77, 1.41) | 0.86 (0.74, 0.998) | 1 (ref) | 0.85 (0.73, 0.99) | 0.56 (0.39, 0.80) |
| Excluding women with a history of night shift work | | | | | |
| n=4,407 | 1.15 (0.69, 1.91) | 0.94 (0.73, 1.20) | 1 (ref) | 1.01 (0.80, 1.28) | 0.47 (0.25, 0.87) |
| Restriction: Sleep position = on sides | | | | | |
| n=10,156 | 0.84 (0.60, 1.18) | 0.88 (0.75, 1.03) | 1 (ref) | 0.81 (0.69, 0.96) | 0.62 (0.42, 0.91) |
| Restricted to women who did not snore regularly | | | | | |
| n=10,974 | 0.87 (0.64, 1.20) | 0.86 (0.74, 0.999) | 1 (ref) | 0.80 (0.68, 0.93) | 0.63 (0.45, 0.90) |

*Model was adjusted for age (continuous), education (registered nurse, bachelor, or graduate), marital status (married, widowed, or separated/divorced), household income (quintiles); family history of cancer, MI and diabetes (yes or no); baseline hypertension and high cholesterol (yes or no); menopausal status and hormone use (premenopausal, postmenopausal never users, postmenopausal past users, postmenopausal current users), aspirin use (regular use or not), smoking history (never, former smoker, current smoker), alcohol intake (none, 1-14.9, ≥15 g/d), total energy intake(quintiles), diet quality(Alternate Healthy Eating Index score, quintiles), physical activity (MET-h/wk), standing and sitting time (all in quintiles); BMI (<18.5, 18.5-24.9, 25-29.9, ≥30 kg/m2).
